# Supplementary material for: Digital Intervention for Cognitive Deficits in Major Depression: A Randomized Controlled Trial to Assess Efficacy and Safety in Adults
Source: Atypon-hosted journal article supplement (doi:10.1176/appi.ajp.21020125), 2022-04-12
Supplement: appi.ajp.21020125.ds001.pdf [file appi.ajp.21020125.ds001.pdf]

 


Psychiatry Online
